# Supplementary material
Source: HighWire-hosted journal article supplement (https://hw-f5-jim.highwire.org/content/69/7/1367)

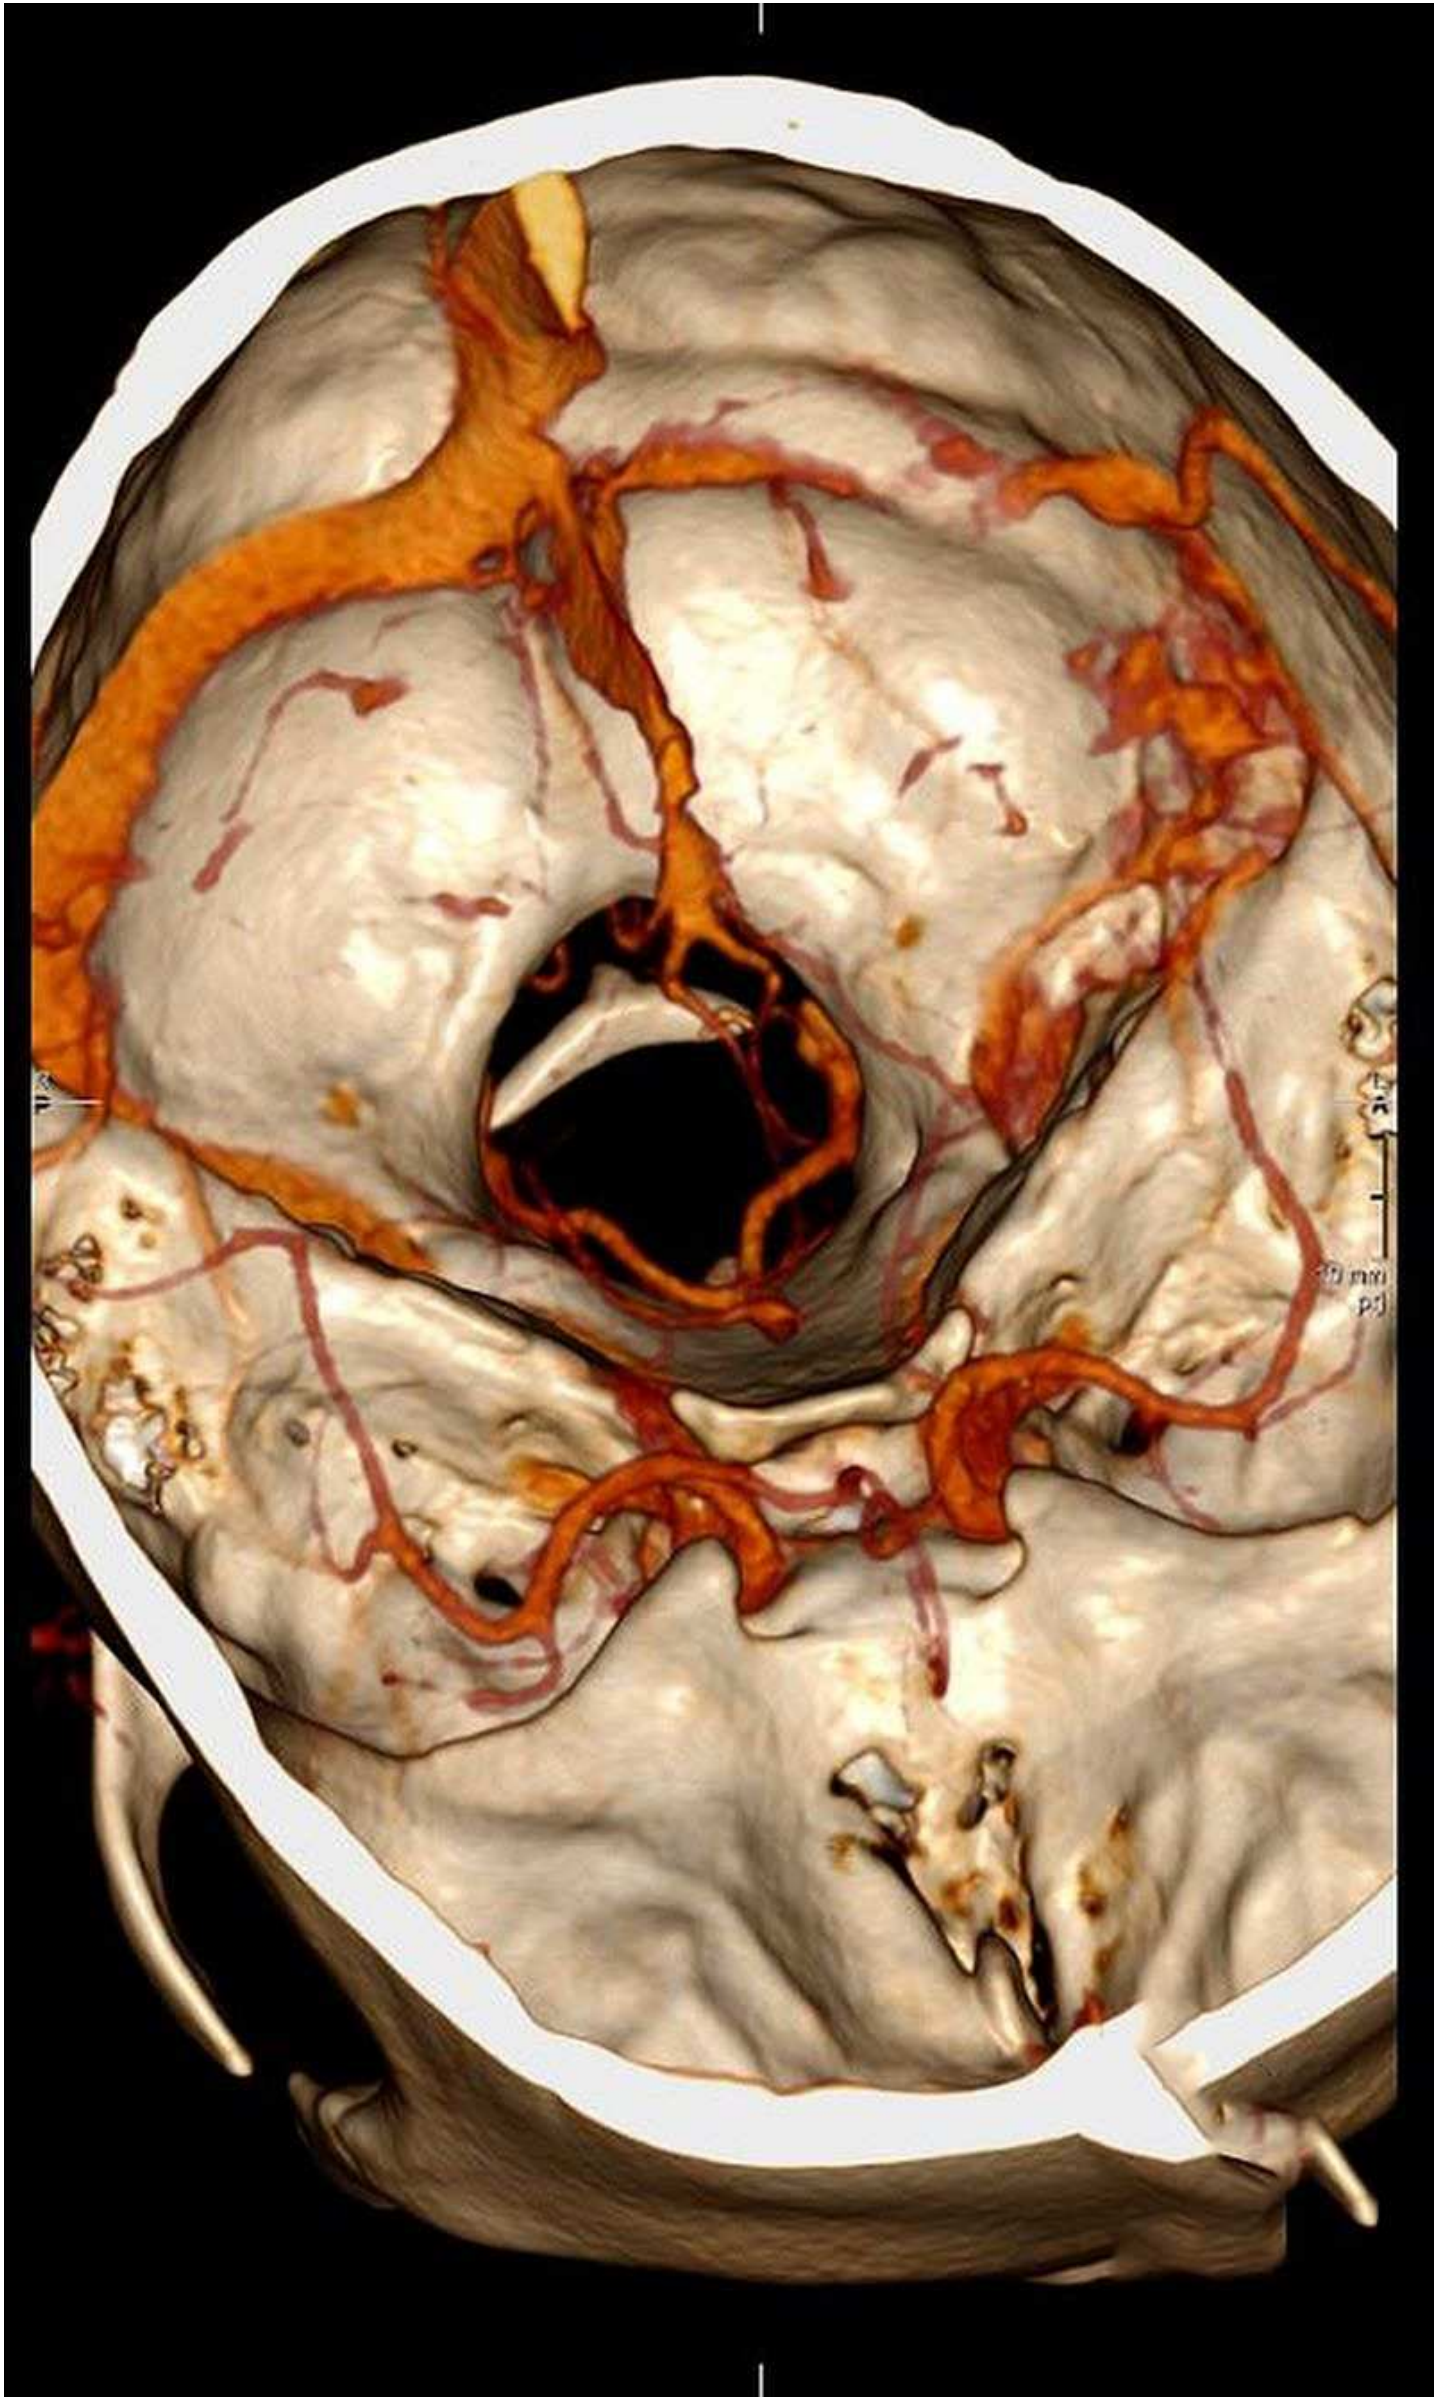

Supplement: inline-supplementary-material-1 [file inline-supplementary-material-1.pdf]
